# Supplementary figures and images for: CCHFV GP38 and GP85 interact with cell-surface glycosaminoglycans
Source: Research Square preprint supplement (doi:10.21203/rs.3.rs-8680483/v1), 2026-02-03

Figure 1 A uncropped


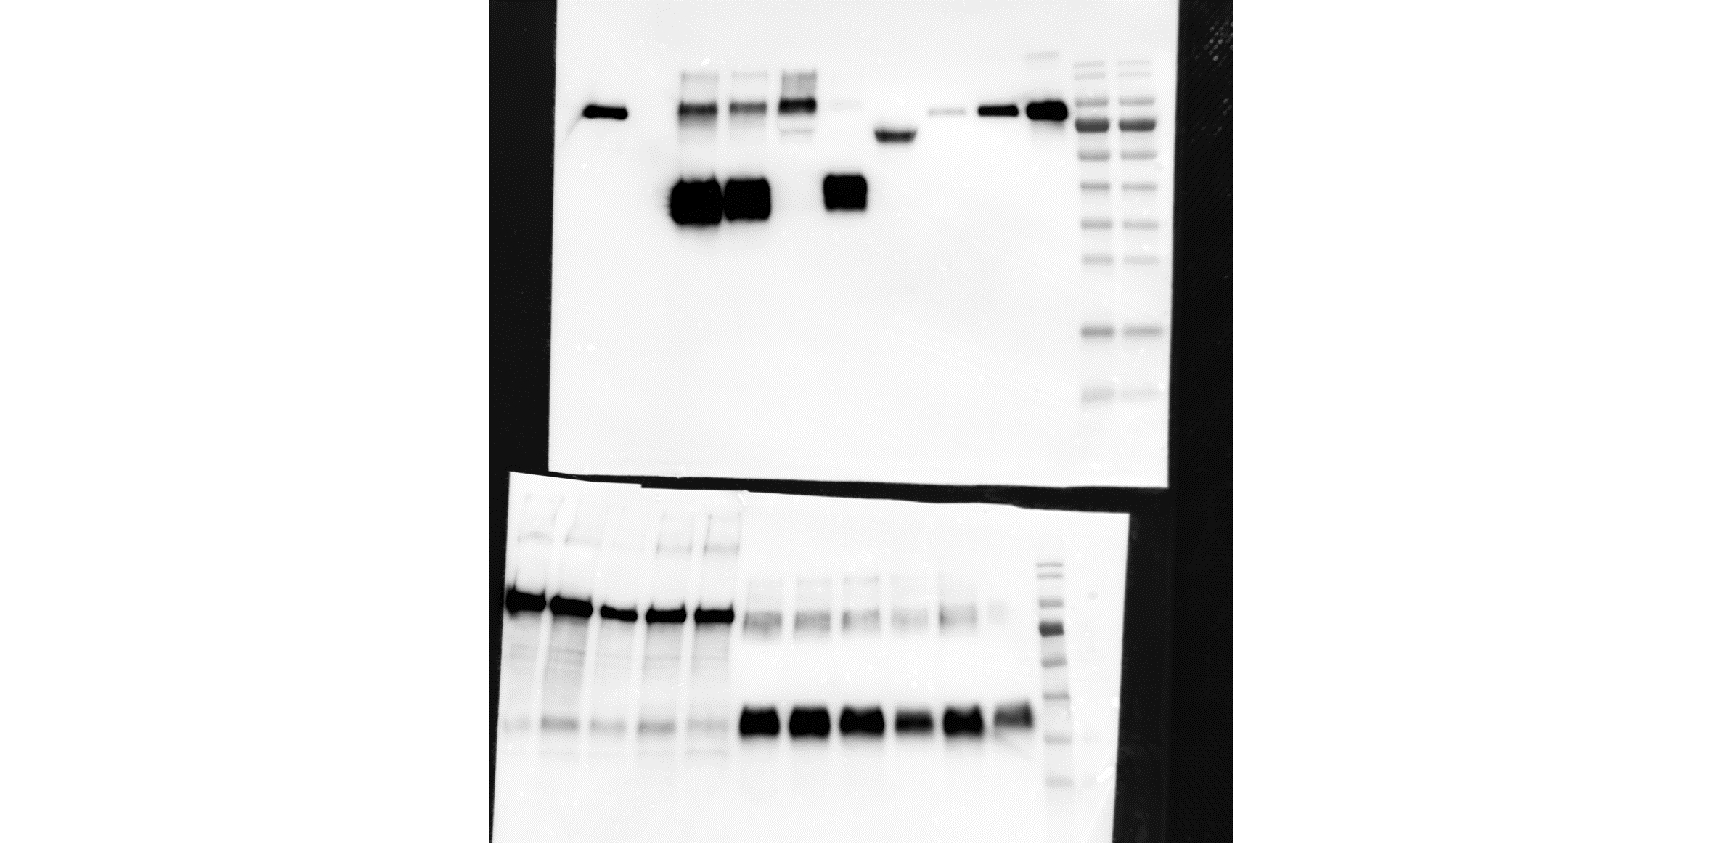


Figure 2 G uncropped


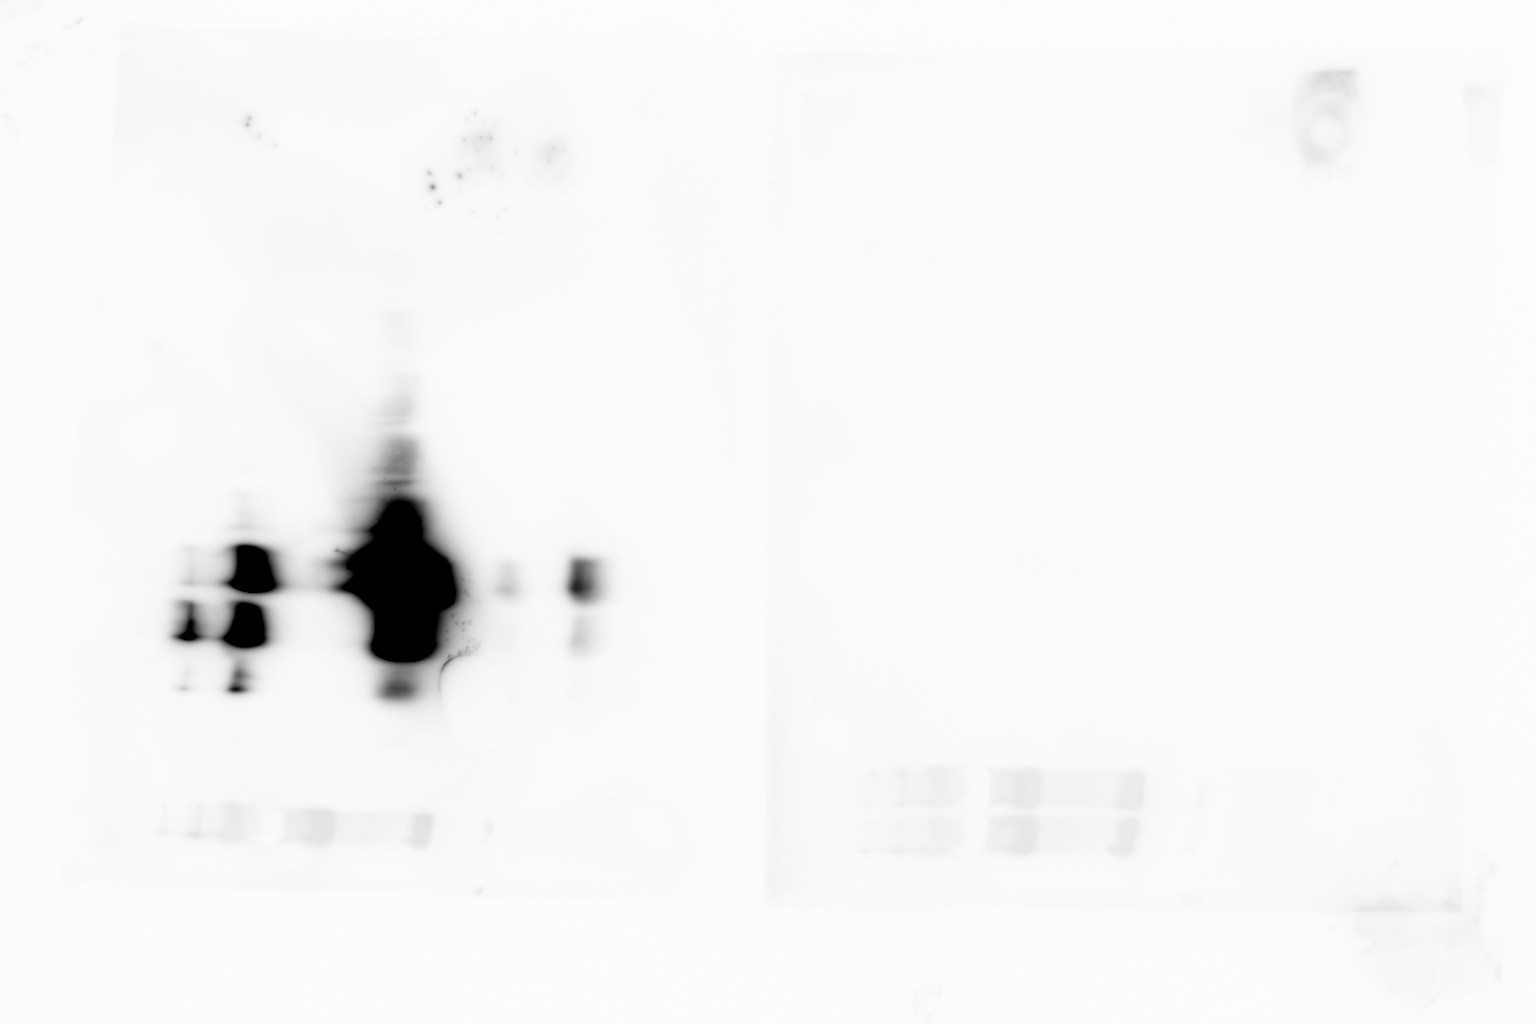


Supplementary 1-a uncropped


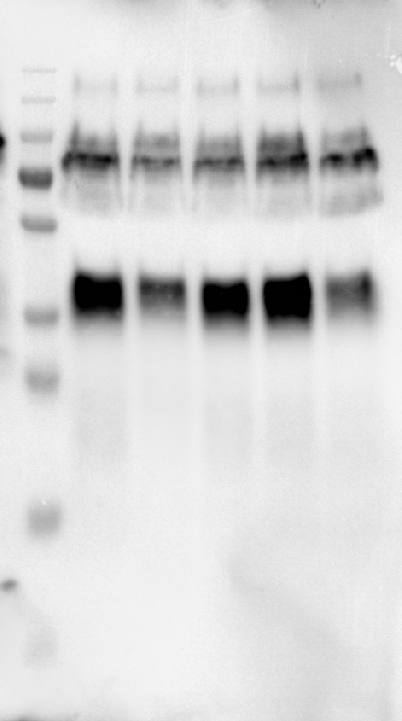


Supplementary 1-b uncropped


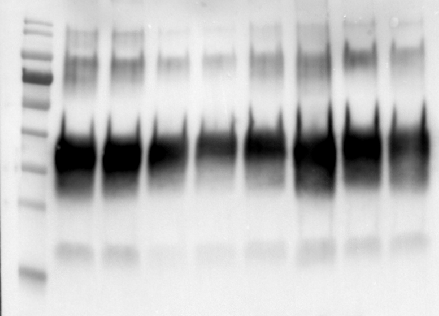

Supplement: Supplementary file 1 [file f3406af149505c844d5cd906.docx]
